# Supplementary material for: Black phosphorous/palladium functionalized carbon aerogel nanocomposite for highly efficient ethanol electrooxidation
Source: Royal Society of Chemistry journal article supplement (doi:10.1039/d2ra05452c), 2022-01-01
Supplement: d2ra05452c1.pdf [file d2ra05452c1.pdf]

## SUPPLEMENTARY INFORMATION

### **Black Phosphorous/Palladium Functionalized Carbon Aerogel Nanocomposite for Highly Efficient Ethanol Electrooxidation**

Ibrahim Abdelwahab<sup>1\*</sup> and Abdalla Abdelwahab<sup>2,3\*</sup>

<sup>1</sup>*Department of Chemistry, National University of Singapore, Singapore 117543, Singapore*

<sup>2</sup>*Faculty of Science, Galala University, Sokhna, Suez 43511, Egypt*

<sup>3</sup>*Materials Science and Nanotechnology Department, Faculty of Postgraduate Studies for Advanced Sciences, Beni-Suef University, Beni-Suef 62511, Egypt*

\*Correspondence to: [chmiaa@nus.edu.sg](mailto:chmiaa@nus.edu.sg) (I. A.); [aabdelwahab@psas.bsu.edu.eg](mailto:aabdelwahab@psas.bsu.edu.eg) (A. A.)

This PDF file includes:

Supplementary Tables S1 and S2

Supplementary Figures S1 – S3

**Table S1.** Textural analysis of the samples. Porosity and surface area values calculated using the BET and BJH models.

| Sample   | $S_{\text{BET}}$<br>m <sup>2</sup> /g | $W_0(\text{N}_2)$<br>cm <sup>3</sup> /g | $L_0(\text{N}_2)$<br>nm | $V_{0.95}(\text{N}_2)$<br>cm <sup>3</sup> /g | $V_{\text{meso}}(\text{N}_2)$<br>cm <sup>3</sup> /g | $S_{\text{BJH}}$<br>m <sup>2</sup> /g | $V_{\text{BJH}}$<br>cm <sup>3</sup> /g | $L_0(\text{BJH})$<br>nm |
|----------|---------------------------------------|-----------------------------------------|-------------------------|----------------------------------------------|-----------------------------------------------------|---------------------------------------|----------------------------------------|-------------------------|
| CA       | 358                                   | 0.175                                   | 1.32                    | 0.238                                        | 0.062                                               | 105.3                                 | 0.104                                  | 3.9                     |
| Pd/CA    | 277                                   | 0.127                                   | 1.45                    | 0.253                                        | 0.126                                               | 123.7                                 | 0.131                                  | 4.2                     |
| BP/Pd/CA | 280                                   | 0.134                                   | 1.45                    | 0.273                                        | 0.139                                               | 129.7                                 | 0.152                                  | 4.7                     |

$S_{\text{BET}}$  = total surface area;  $W_0(\text{N}_2)$  = micropore volume;  $L_0(\text{N}_2)$  = mean micropore width;  $V_{0.95}(\text{N}_2)$  = total volume of nitrogen adsorbed at a relative pressure of 0.95;  $V_{\text{meso}}$  = mesopores volume calculated by  $V_{0.95}(\text{N}_2) - W_0(\text{N}_2)$ ;  $S_{\text{BJH}}$  = mesopore surface area;  $V_{\text{BJH}}$  = mesopore volume estimated by the BJH method;  $L_0(\text{BJH})$  = mean mesopore width.

**Table S2.** Position and full width at the half maximum (FWHM) of the C-C peak obtained from the deconvolution of XPS  $\text{C}_{1s}$  spectra of the samples. The mean particle size ( $d_{\text{XRD}}$ ) of Co (in CA) and Pd (in Pd/CA and BP/Pd/CA) NPs estimated from the XRD Cr (110) and Pd (111) peaks using the Scherrer's equation.

| Sample   | $\text{C}_{1s}$ peak position | $\text{C}_{1s}$ FWHM | $d_{\text{XRD}}$ (nm) |
|----------|-------------------------------|----------------------|-----------------------|
|          | (eV)                          | (eV)                 |                       |
| CA       | 284.8                         | 2.15                 | 13.9 (Co)             |
| Pd/CA    | 284.8                         | 2.09                 | 17.5 (Pd)             |
| BP/Pd/CA | 284.9                         | 1.98                 | 19.2 (Pd)             |

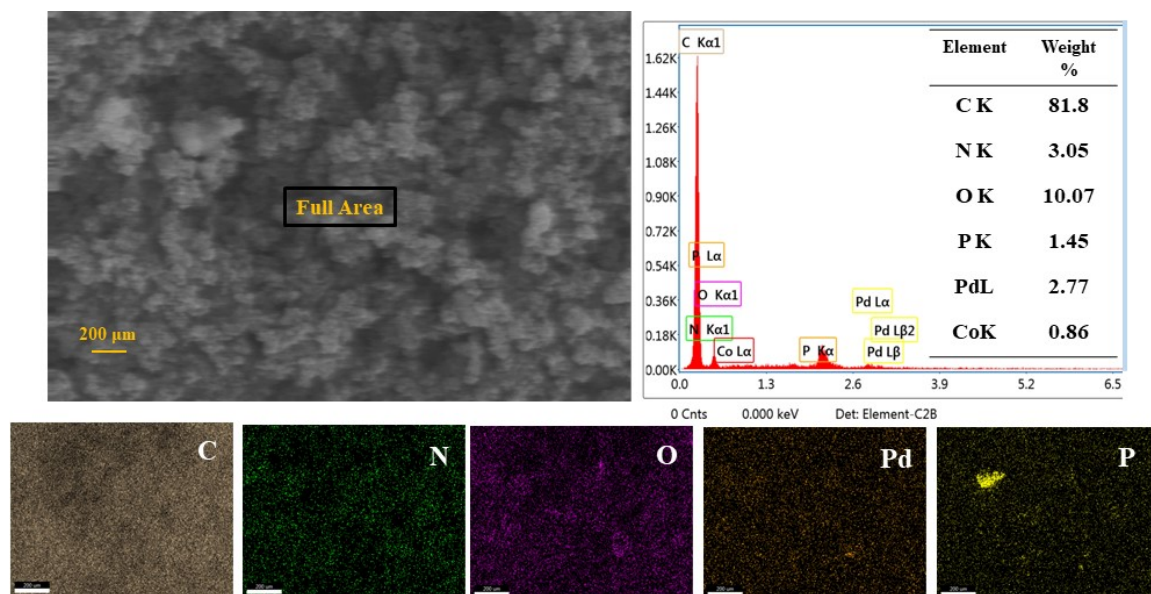

**Figure S1.** Energy dispersive spectroscopy (EDS) and elemental mapping analysis of BP/Pd/CA.

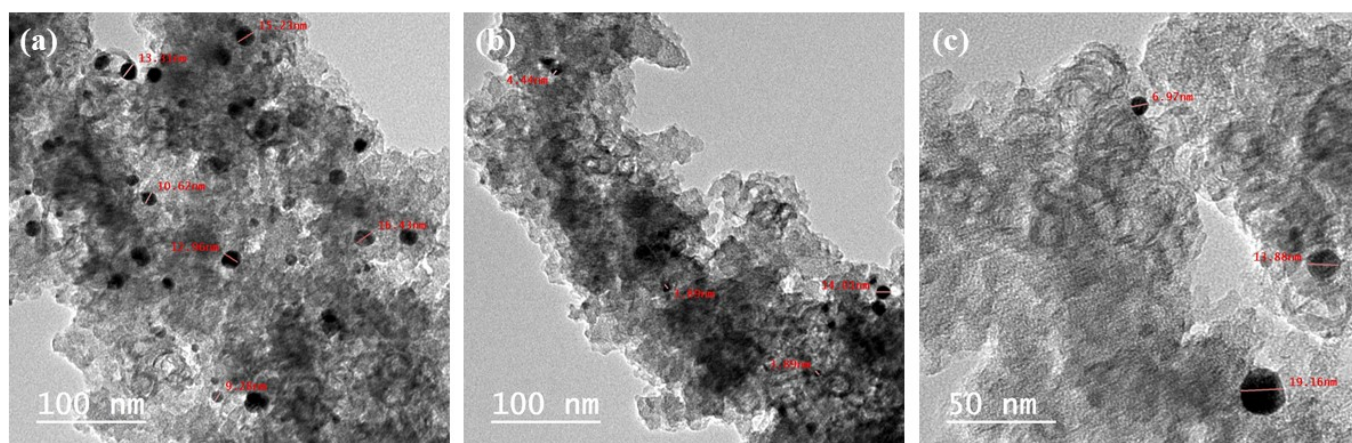

**Figure S2.** High-resolution TEM images of the BP/Pd/CA sample at different magnifications, highlighting the particle size of the catalytic NPs.

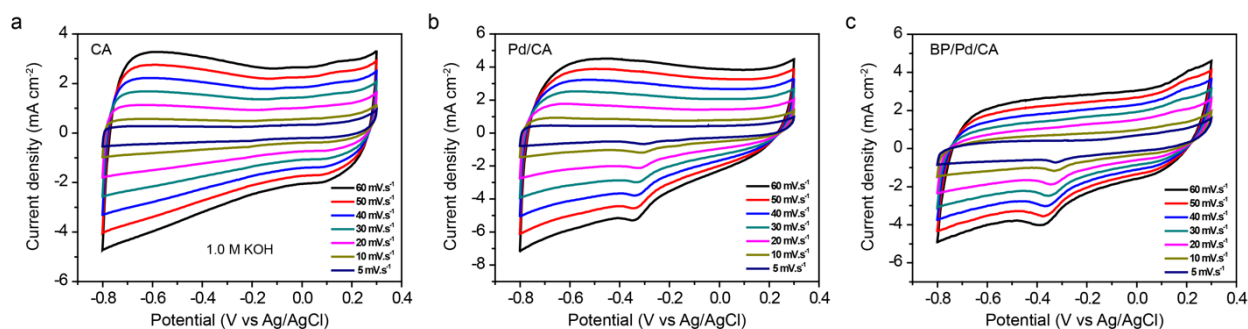

**Figure S3.** Room-temperature cyclic voltammograms of (a) CA, (b) Pd/CA, and (c) BP/Pd/CA in 1.0 M KOH solution at various scan rates.
